# Supplementary material for: Multiplex secretome engineering enhances recombinant protein production and purity
Source: PubMed Central journal article supplement (PMC7170862; doi:10.1038/s41467-020-15866-w), 2020-04-20
Supplement: 41467_2020_15866_MOESM7_ESM.pdf [file 41467_2020_15866_MOESM7_ESM.pdf]

## Reporting Summary

Nature Research wishes to improve the reproducibility of the work that we publish. This form provides structure for consistency and transparency in reporting. For further information on Nature Research policies, see [Authors & Referees](#) and the [Editorial Policy Checklist](#).

### Statistics

For all statistical analyses, confirm that the following items are present in the figure legend, table legend, main text, or Methods section.

n/a Confirmed

- |                                     |                                     |                                                                                                                                                                                                                                                            |
|-------------------------------------|-------------------------------------|------------------------------------------------------------------------------------------------------------------------------------------------------------------------------------------------------------------------------------------------------------|
| <input type="checkbox"/>            | <input checked="" type="checkbox"/> | The exact sample size ( $n$ ) for each experimental group/condition, given as a discrete number and unit of measurement                                                                                                                                    |
| <input type="checkbox"/>            | <input checked="" type="checkbox"/> | A statement on whether measurements were taken from distinct samples or whether the same sample was measured repeatedly                                                                                                                                    |
| <input type="checkbox"/>            | <input checked="" type="checkbox"/> | The statistical test(s) used AND whether they are one- or two-sided<br><i>Only common tests should be described solely by name; describe more complex techniques in the Methods section.</i>                                                               |
| <input checked="" type="checkbox"/> | <input type="checkbox"/>            | A description of all covariates tested                                                                                                                                                                                                                     |
| <input type="checkbox"/>            | <input checked="" type="checkbox"/> | A description of any assumptions or corrections, such as tests of normality and adjustment for multiple comparisons                                                                                                                                        |
| <input type="checkbox"/>            | <input checked="" type="checkbox"/> | A full description of the statistical parameters including central tendency (e.g. means) or other basic estimates (e.g. regression coefficient) AND variation (e.g. standard deviation) or associated estimates of uncertainty (e.g. confidence intervals) |
| <input type="checkbox"/>            | <input checked="" type="checkbox"/> | For null hypothesis testing, the test statistic (e.g. $F$ , $t$ , $r$ ) with confidence intervals, effect sizes, degrees of freedom and $P$ value noted<br><i>Give <math>P</math> values as exact values whenever suitable.</i>                            |
| <input checked="" type="checkbox"/> | <input type="checkbox"/>            | For Bayesian analysis, information on the choice of priors and Markov chain Monte Carlo settings                                                                                                                                                           |
| <input checked="" type="checkbox"/> | <input type="checkbox"/>            | For hierarchical and complex designs, identification of the appropriate level for tests and full reporting of outcomes                                                                                                                                     |
| <input checked="" type="checkbox"/> | <input type="checkbox"/>            | Estimates of effect sizes (e.g. Cohen's $d$ , Pearson's $r$ ), indicating how they were calculated                                                                                                                                                         |

*Our web collection on [statistics for biologists](#) contains articles on many of the points above.*

### Software and code

Policy information about [availability of computer code](#)

Data collection Flow cytometry data was collected using FlowJo v10 (BD Biosciences)

Data analysis Statistical analysis was done using GraphPad Prism 8.4, modelling of protein secretion was performed using MATLAB 2018B [<https://github.com/LewisLabUCSD/CHOSecretoryKO>], liquid chromatography data was analyzed with Progenesis Q1 software v3.0, glycans were quantified using Thermo Xcalibur software v4.1. RNA-seq analysis was performed using FastQC v0.11, Trimmomatic v0.39, STAR v2.7.0a, HTSeq v0.11.3, DESeq2 v1.26.0. Gene set enrichment analysis (GSEA) was performed using the Broad Institute GSEA software v3.0.0.

For manuscripts utilizing custom algorithms or software that are central to the research but not yet described in published literature, software must be made available to editors/reviewers. We strongly encourage code deposition in a community repository (e.g. GitHub). See the Nature Research [guidelines for submitting code & software](#) for further information.

### Data

Policy information about [availability of data](#)

All manuscripts must include a [data availability statement](#). This statement should provide the following information, where applicable:

- Accession codes, unique identifiers, or web links for publicly available datasets
- A list of figures that have associated raw data
- A description of any restrictions on data availability

Raw RNAseq data that support the findings of this study have been deposited at the Gene Expression Omnibus and Short Read Archive with the accession number GSE144624 [<https://www.ncbi.nlm.nih.gov/geo/query/acc.cgi?acc=GSE144624>]. The authors declare that all other data supporting the findings of this study are available within the paper and its supplementary information files. The source data for figures 1-5, table 1, and supplementary figures 1-4 and 6 are provided as a source data file.

## Field-specific reporting

Please select the one below that is the best fit for your research. If you are not sure, read the appropriate sections before making your selection.

- Life sciences     Behavioural & social sciences     Ecological, evolutionary & environmental sciences

For a reference copy of the document with all sections, see [nature.com/documents/nr-reporting-summary-flat.pdf](https://www.nature.com/documents/nr-reporting-summary-flat.pdf)

## Life sciences study design

All studies must disclose on these points even when the disclosure is negative.

|                 |                                                                                                                                                                                                                                                                                                                                                                                                                                                                                                                                                                                                                                                                                                                                                                                                                                                                                                                                  |
|-----------------|----------------------------------------------------------------------------------------------------------------------------------------------------------------------------------------------------------------------------------------------------------------------------------------------------------------------------------------------------------------------------------------------------------------------------------------------------------------------------------------------------------------------------------------------------------------------------------------------------------------------------------------------------------------------------------------------------------------------------------------------------------------------------------------------------------------------------------------------------------------------------------------------------------------------------------|
| Sample size     | Sample size choice was not predetermined by a statistical method.                                                                                                                                                                                                                                                                                                                                                                                                                                                                                                                                                                                                                                                                                                                                                                                                                                                                |
| Data exclusions | No data were excluded from analysis                                                                                                                                                                                                                                                                                                                                                                                                                                                                                                                                                                                                                                                                                                                                                                                                                                                                                              |
| Replication     | We confirm that all attempts at replication were successful. Statistical parameters including the exact value of n, p values, and the types of the statistical tests are reported in the figures and corresponding figure legends. Statistical analysis was carried out using Prism 8.4 (GraphPad Software). Statistical analysis was conducted on data from three or more independent experimental replicates. Data distribution was assumed to be normal, but this was not formally tested. Comparisons between groups were planned before statistical testing and target effect sizes were not predetermined. Error bars displayed on graphs represent the mean+/-SD of at least three independent experiments. Most experiments report technical replicates, whereas biological variability was addressed in the clonal variation experiment. *p<0.05, **p<0.01, ***p<0.001, and ****p < 0.0001 were considered significant. |
| Randomization   | No randomization method was used                                                                                                                                                                                                                                                                                                                                                                                                                                                                                                                                                                                                                                                                                                                                                                                                                                                                                                 |
| Blinding        | Genome editing and all assays were run by a supporting lab technicians who were not informed on the study nor expected outcomes. Analysis was performed unblind.                                                                                                                                                                                                                                                                                                                                                                                                                                                                                                                                                                                                                                                                                                                                                                 |

## Reporting for specific materials, systems and methods

We require information from authors about some types of materials, experimental systems and methods used in many studies. Here, indicate whether each material, system or method listed is relevant to your study. If you are not sure if a list item applies to your research, read the appropriate section before selecting a response.

### Materials & experimental systems

|                                     |                                                           |
|-------------------------------------|-----------------------------------------------------------|
| n/a                                 | Included in the study                                     |
| <input type="checkbox"/>            | <input checked="" type="checkbox"/> Antibodies            |
| <input type="checkbox"/>            | <input checked="" type="checkbox"/> Eukaryotic cell lines |
| <input checked="" type="checkbox"/> | <input type="checkbox"/> Palaeontology                    |
| <input checked="" type="checkbox"/> | <input type="checkbox"/> Animals and other organisms      |
| <input checked="" type="checkbox"/> | <input type="checkbox"/> Human research participants      |
| <input checked="" type="checkbox"/> | <input type="checkbox"/> Clinical data                    |

### Methods

|                                     |                                                    |
|-------------------------------------|----------------------------------------------------|
| n/a                                 | Included in the study                              |
| <input checked="" type="checkbox"/> | <input type="checkbox"/> ChIP-seq                  |
| <input type="checkbox"/>            | <input checked="" type="checkbox"/> Flow cytometry |
| <input checked="" type="checkbox"/> | <input type="checkbox"/> MRI-based neuroimaging    |

## Antibodies

|                 |                                                                                                                                                                                                                                                                                                                                                                                                                                                                                                                                                                                               |
|-----------------|-----------------------------------------------------------------------------------------------------------------------------------------------------------------------------------------------------------------------------------------------------------------------------------------------------------------------------------------------------------------------------------------------------------------------------------------------------------------------------------------------------------------------------------------------------------------------------------------------|
| Antibodies used | Primary: Human CD20 (Rituximab) MAbs (Clone Hu2) MAB9575. Secondary: Goat F(ab') <sub>2</sub> Anti-Human IgG - Fc (PE), pre-adsorbed (ab98596). Goat anti-Human IgG Fc Secondary Antibody, FITC (H10001C)                                                                                                                                                                                                                                                                                                                                                                                     |
| Validation      | <a href="https://www.rndsystems.com/products/human-cd20-rituximab-mab-clone-hu2-hu2_mab9575">https://www.rndsystems.com/products/human-cd20-rituximab-mab-clone-hu2-hu2_mab9575</a> . <a href="https://www.abcam.com/goat-fab2-human-igg-fc-pe-pre-adsorbed-ab98596.html">https://www.abcam.com/goat-fab2-human-igg-fc-pe-pre-adsorbed-ab98596.html</a> . <a href="https://www.thermofisher.com/antibody/product/Goat-anti-Human-IgG-Fc-Secondary-Antibody-Polyclonal/H10001C">https://www.thermofisher.com/antibody/product/Goat-anti-Human-IgG-Fc-Secondary-Antibody-Polyclonal/H10001C</a> |

## Eukaryotic cell lines

Policy information about [cell lines](#)

|                          |                                                                                                                                      |
|--------------------------|--------------------------------------------------------------------------------------------------------------------------------------|
| Cell line source(s)      | CHO-S cell line, Thermo Fisher. Jurkat cell line, DSMZ, ACC 282. Ramos cell line, DSMZ, ACC 603.                                     |
| Authentication           | Original CHO-S cell line was banked according to cGMP rules. All cell lines from DSMZ have been thoroughly tested and authenticated. |
| Mycoplasma contamination | All new cell lines were tested negative for Mycoplasma infection and were kept in quarantine until confirmed.                        |

Commonly misidentified lines  
(See [ICLAC](#) register)

none

## Flow Cytometry

### Plots

Confirm that:

- The axis labels state the marker and fluorochrome used (e.g. CD4-FITC).
- The axis scales are clearly visible. Include numbers along axes only for bottom left plot of group (a 'group' is an analysis of identical markers).
- All plots are contour plots with outliers or pseudocolor plots.
- A numerical value for number of cells or percentage (with statistics) is provided.

### Methodology

Sample preparation

Ramos cells (2x10<sup>5</sup> cells per well; DSMZ, ACC 603) were blocked with PBS containing 5% BSA for 10 minutes and incubated with 100  $\mu$ L of the Rituximab dilutions for 1 h at 4°C. Cells were washed 3 times with PBS and subsequently incubated for 30 min at 4°C with 5  $\mu$ g/ml of phycoerythrin-conjugated goat F(ab') anti-human IgG (Abcam, Cambridge, UK) as secondary antibody. After washing the cells 3x with PBS, binding was quantified in triplicate by flow cytometry using MACSQuant analyzer 10 VYB (Miltenyi Biotec, Bergisch Gladbach, Germany). Jurkat cells were used as CD20 negative cell line and a Rituximab biosimilar antibody (R&D systems, Minneapolis, MN, USA) was included as reference anti-CD20 antibody at the indicated dilutions.

Instrument

MACSQuant VYB (Miltenyi Biotec)

Software

FlowJo v10 (BD Biosciences)

Cell population abundance

no cell sorting was performed

Gating strategy

FSC-H/FSC-A was the initial gating for singlets, then FSC-A/SSC-A for cells of interest, then the mean fluorescence intensity was measured.

- Tick this box to confirm that a figure exemplifying the gating strategy is provided in the Supplementary Information.
